# Supplementary material for: The cationic cluster Grignard [{MgCl(thf)2}3(μ3-C3H5)2]+
Source: Royal Society of Chemistry journal article supplement (doi:10.1039/b602059c), 2006-01-01
Supplement: b602059c.pdf [file b602059c.pdf]

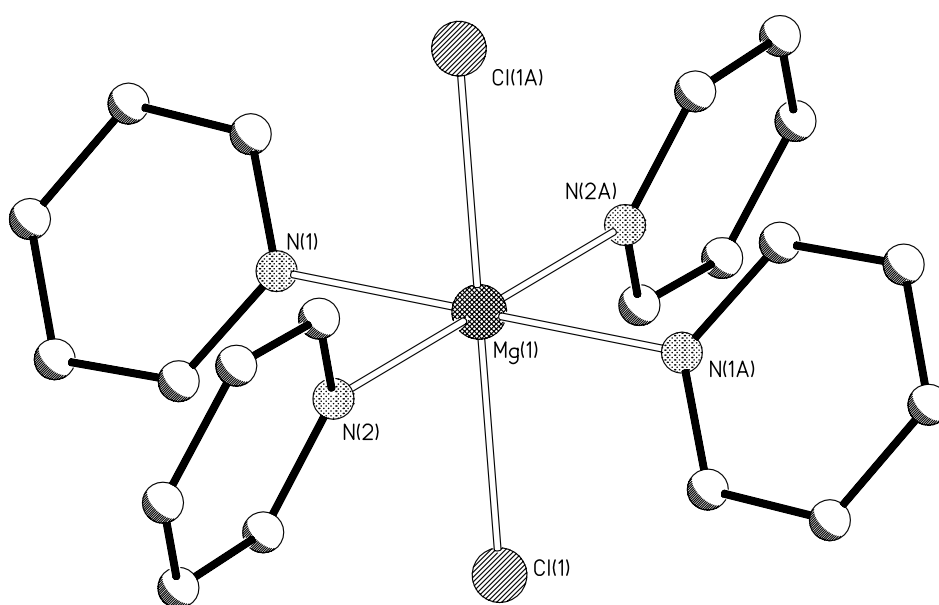

Molecular structure of complex **3**. Two independent molecules are present in the unit cell, each with a strict (crystallographic) inversion centre. Selected bond distances (Å) and angles (°): Mg(1)–Cl(1) 2.4832(5), Mg(1)–N(1) 2.2561(18), Mg(1)–N(2) 2.2803(19), Cl(1)–Mg(1)–Cl(1A) 180.00(4), N(1)–Mg(1)–N(1A) 180.00(11), N(2)–Mg(1)–N(2A) 180.0, N(1)–Mg(1)–Cl(1) 89.44(5), N(2)–Mg(1)–Cl(1) 90.06(5).
